# Supplementary material for: The ferroptosis inducer erastin irreversibly inhibits system xc− and synergizes with cisplatin to increase cisplatin’s cytotoxicity in cancer cells
Source: PubMed Central journal article supplement (PMC5772355; doi:10.1038/s41598-018-19213-4), 2018-01-17

# **The ferroptosis inducer erastin irreversibly inhibits system x<sub>c</sub><sup>-</sup> and synergizes with cisplatin to increase cisplatin's cytotoxicity in cancer cells**

Mami Sato<sup>1,3</sup>, Ryosuke Kusumi<sup>1</sup>, Shinji Hamashima<sup>2,3</sup>, Sho Kobayashi<sup>2,3</sup>, Satoru Sasaki<sup>3</sup>, Yuhei Komiyama<sup>3</sup>, Takuji Izumikawa<sup>4</sup>, Marcus Conrad<sup>5</sup>, Shiro Bannai<sup>1</sup>, and Hideyo Sato<sup>1\*</sup>

## **Supplementary Information**

**Supplementary Fig. S1. Effect of erastin on the activity of cystine uptake in xCT-overexpressing and wild-type MEF.** xCT-overexpressing (OE) and wild-type (WT) MEF were cultured for 24 h and subsequently incubated in the absence or presence of 100 μM erastin for 5 min. After the incubation with erastin, the uptake of 0.05 mM L-[<sup>14</sup>C]cystine was measured in the absence of erastin. The percent inhibition of the uptake of cystine in OE-MEF and WT-MEF treated with erastin was 97.9% and 75.2%, respectively. Data represent the mean of the activity of cystine uptake ± S.D. in OE-MEF and the mean of the activity of cystine uptake in WT-MEF. Each point represents the mean ± S.D. (n=4). P values were obtained by unpaired Student's t test. \*\*\*P=5 x 10<sup>-4</sup> (OE-MEF vs OE-MEF + Erastin), 2 x 10<sup>-4</sup> (WT-MEF vs WT-MEF + Erastin).

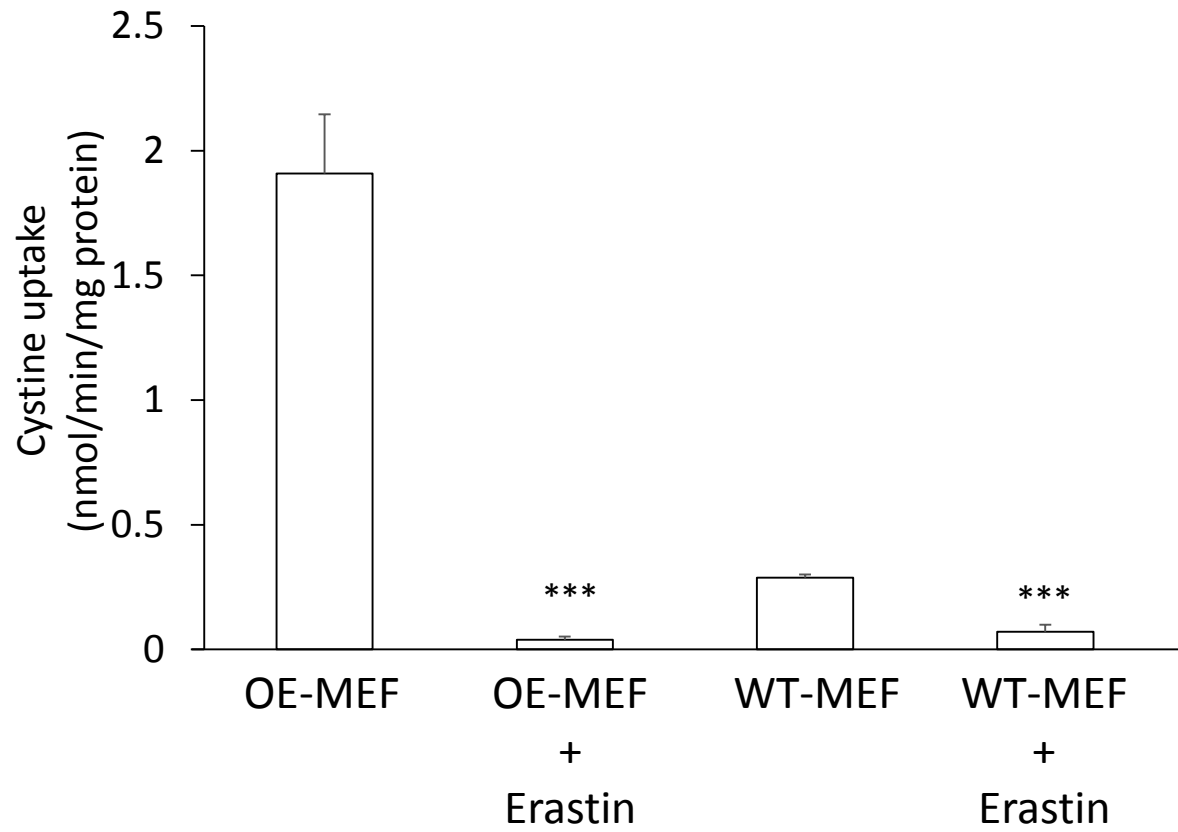

Supplement: 41598_2018_19213_MOESM1_ESM.pdf [file 41598_2018_19213_MOESM1_ESM.pdf]
